# Supplementary material for: Synergy: A Web Resource for Exploring Gene Regulation in Synechocystis sp. PCC6803
Source: PLoS One. 2014 Nov 24;9(11):e113496. doi: 10.1371/journal.pone.0113496 (PMC4242644; doi:10.1371/journal.pone.0113496)
Supplement: File S1 — GO enrichment of the genes with the highest centrality. (XLS) [file pone.0113496.s001.xls]

## Sheet: Centrality enrichment
Degree centrality enrichment				Betweenness centrality enrichment
Top 5 (avg centrality: 0.263):	Description	q-value		Top 5 (avg centrality: 0.033):	Description	q-value
GO:1901362	organic cyclic compound biosynthetic process	0.508		GO:1901362	organic cyclic compound biosynthetic process	0.508
GO:0019438	aromatic compound biosynthetic process	0.508		GO:0019438	aromatic compound biosynthetic process	0.508
GO:0018130	heterocycle biosynthetic process	0.508		GO:0018130	heterocycle biosynthetic process	0.508
GO:0044271	cellular nitrogen compound biosynthetic process	0.508		GO:0044271	cellular nitrogen compound biosynthetic process	0.508
GO:1901566	organonitrogen compound biosynthetic process	0.535		GO:1901566	organonitrogen compound biosynthetic process	0.535
GO:1901564	organonitrogen compound metabolic process	0.812		GO:1901564	organonitrogen compound metabolic process	0.812
GO:0044710	single-organism metabolic process	0.848		GO:0044710	single-organism metabolic process	0.848
GO:1901360	organic cyclic compound metabolic process	0.848		GO:1901360	organic cyclic compound metabolic process	0.848
GO:1901576	organic substance biosynthetic process	0.848		GO:1901576	organic substance biosynthetic process	0.848
GO:0046483	heterocycle metabolic process	0.848		GO:0046483	heterocycle metabolic process	0.848
Top 10 (avg centrality: 0.241):				Top 10 (avg centrality: 0.021):
GO:0016491	oxidoreductase activity	1		GO:0015979	photosynthesis	0.0575
GO:0015979	photosynthesis	1		GO:0042651	thylakoid membrane	0.0575
GO:0006118	electron transport	1		GO:0030089	phycobilisome	0.0575
GO:1901362	organic cyclic compound biosynthetic process	1		GO:0030076	light-harvesting complex	0.0733
GO:1901564	organonitrogen compound metabolic process	1		GO:0034357	photosynthetic membrane	0.219
GO:0019438	aromatic compound biosynthetic process	1		GO:0006118	electron transport	0.219
GO:0000166	nucleotide binding	1		GO:0009579	thylakoid	0.219
GO:0018130	heterocycle biosynthetic process	1		GO:0044436	thylakoid part	0.219
GO:0044424	intracellular part	1		GO:0043234	protein complex	0.957
GO:0009058	biosynthetic process	1		GO:0016491	oxidoreductase activity	1
Top 20 (avg centrality: 0.211):				Top 20 (avg centrality: 0.013):
GO:0015979	photosynthesis	0.0111		GO:0015979	photosynthesis	0.21
GO:0034357	photosynthetic membrane	0.0261		GO:0034357	photosynthetic membrane	0.329
GO:0009579	thylakoid	0.0261		GO:0009579	thylakoid	0.329
GO:0044436	thylakoid part	0.0261		GO:0044436	thylakoid part	0.329
GO:0042651	thylakoid membrane	0.0261		GO:0030089	phycobilisome	0.329
GO:0030089	phycobilisome	0.0261		GO:0042651	thylakoid membrane	0.353
GO:0030076	light-harvesting complex	0.0294		GO:0030076	light-harvesting complex	0.507
GO:0031976	plastid thylakoid	0.0531		GO:0043234	protein complex	1
GO:0031984	organelle subcompartment	0.0531		GO:0070011	peptidase activity	1
GO:0009535	chloroplast thylakoid membrane	0.0531		GO:0008233	peptidase activity	1
Top 40 (avg centrality: 0.179):				Top 40 (avg centrality: 0.008):
GO:0015979	photosynthesis	0.000928		GO:0015979	photosynthesis	0.0134
GO:0034357	photosynthetic membrane	0.0037		GO:0015994	chlorophyll metabolic process	0.143
GO:0009579	thylakoid	0.0037		GO:0015995	chlorophyll biosynthetic process	0.143
GO:0044436	thylakoid part	0.0037		GO:0033013	tetrapyrrole metabolic process	0.143
GO:0030089	phycobilisome	0.0037		GO:0044435	plastid part	0.143
GO:0042651	thylakoid membrane	0.0053		GO:0044434	chloroplast part	0.143
GO:0031976	plastid thylakoid	0.00666		GO:0009507	chloroplast	0.143
GO:0031984	organelle subcompartment	0.00666		GO:0042651	thylakoid membrane	0.143
GO:0009535	chloroplast thylakoid membrane	0.00666		GO:0033014	tetrapyrrole biosynthetic process	0.143
GO:0009534	chloroplast thylakoid	0.00666		GO:0030089	phycobilisome	0.143
Top 60 (avg centrality: 0.161):				Top 60 (avg centrality: 0.006):
GO:0015979	photosynthesis	8.42e-06		GO:0015979	photosynthesis	0.00285
GO:0034357	photosynthetic membrane	0.00109		GO:0044435	plastid part	0.0183
GO:0009579	thylakoid	0.00109		GO:0044434	chloroplast part	0.0183
GO:0044436	thylakoid part	0.00109		GO:0034357	photosynthetic membrane	0.0224
GO:0030089	phycobilisome	0.00986		GO:0033013	tetrapyrrole metabolic process	0.0224
GO:0015994	chlorophyll metabolic process	0.00989		GO:0009579	thylakoid	0.0224
GO:0015995	chlorophyll biosynthetic process	0.00989		GO:0031976	plastid thylakoid	0.0224
GO:0033013	tetrapyrrole metabolic process	0.00989		GO:0031984	organelle subcompartment	0.0224
GO:0031976	plastid thylakoid	0.00989		GO:0044436	thylakoid part	0.0224
GO:0031984	organelle subcompartment	0.00989		GO:0009507	chloroplast	0.0224
Top 80 (avg centrality: 0.149):				Top 80 (avg centrality: 0.005):
GO:0015979	photosynthesis	1.55e-05		GO:0015979	photosynthesis	0.0461
GO:0042440	pigment metabolic process	0.00119		GO:0044435	plastid part	0.0577
GO:0034357	photosynthetic membrane	0.00462		GO:0044434	chloroplast part	0.0577
GO:0015994	chlorophyll metabolic process	0.00462		GO:0034357	photosynthetic membrane	0.0689
GO:0015995	chlorophyll biosynthetic process	0.00462		GO:0018130	heterocycle biosynthetic process	0.0689
GO:0033013	tetrapyrrole metabolic process	0.00462		GO:0031976	plastid thylakoid	0.0689
GO:0046148	pigment biosynthetic process	0.00462		GO:0031984	organelle subcompartment	0.0689
GO:0006778	porphyrin-containing compound metabolic process	0.00462		GO:0009507	chloroplast	0.0689
GO:0044436	thylakoid part	0.00618		GO:0042651	thylakoid membrane	0.0689
GO:0009579	thylakoid	0.00633		GO:0009535	chloroplast thylakoid membrane	0.0689
Top 100 (avg centrality: 0.141):				Top 100 (avg centrality: 0.005):
GO:0015979	photosynthesis	2.17e-07		GO:0034357	photosynthetic membrane	0.0783
GO:0031976	plastid thylakoid	1.37e-06		GO:0015979	photosynthesis	0.0783
GO:0031984	organelle subcompartment	1.37e-06		GO:0044435	plastid part	0.0783
GO:0009535	chloroplast thylakoid membrane	1.37e-06		GO:0044434	chloroplast part	0.0783
GO:0009534	chloroplast thylakoid	1.37e-06		GO:0033014	tetrapyrrole biosynthetic process	0.0783
GO:0009503	thylakoid light-harvesting complex	1.37e-06		GO:1901566	organonitrogen compound biosynthetic process	0.0783
GO:0055035	plastid thylakoid membrane	1.37e-06		GO:0044271	cellular nitrogen compound biosynthetic process	0.0783
GO:0030089	phycobilisome	5.26e-06		GO:0019438	aromatic compound biosynthetic process	0.0819
GO:0042651	thylakoid membrane	1.37e-05		GO:0033013	tetrapyrrole metabolic process	0.0819
GO:0034357	photosynthetic membrane	2.18e-05		GO:0018130	heterocycle biosynthetic process	0.0819
