# Supplementary material for: Synergy: A Web Resource for Exploring Gene Regulation in Synechocystis sp. PCC6803
Source: PLoS One. 2014 Nov 24;9(11):e113496. doi: 10.1371/journal.pone.0113496 (PMC4242644; doi:10.1371/journal.pone.0113496)
Supplement: File S3 — Best sequence alignments with Arabidopsis genes. (XLS) [file pone.0113496.s003.xls]

## Sheet: go_photo_coexp3_at_e10.txt
Synechocystis ORF	Arabidopsis gene model	Arabidopsis transcript	% identity	Alignment length	E-value	Bit score
slr1834	ATCG00350	ATCG00350.1|PACid:19637978	80.45	752	0	1252
slr1835	ATCG00340	ATCG00340.1|PACid:19637953	79.84	734	0	1215
slr0906	ATCG00680	ATCG00680.1|PACid:19637991	76.13	507	0	808
sll0851	ATCG00280	ATCG00280.1|PACid:19637949	80.97	473	0	768
sll1867	ATCG00020	ATCG00020.1|PACid:19637957	83.89	360	0	640
slr1311	ATCG00020	ATCG00020.1|PACid:19637957	83.89	360	0	640
sll0849	ATCG00270	ATCG00270.1|PACid:19637999	84.99	353	0	625
slr0927	ATCG00270	ATCG00270.1|PACid:19637999	84.99	353	0	625
slr1181	ATCG00020	ATCG00020.1|PACid:19637957	80.75	348	0	603
sll1091	AT1G74470	AT1G74470.1|PACid:19650147	68.32	404	0	544
slr1030	AT4G18480	AT4G18480.1|PACid:19645186	73.98	342	4e-176	500
sll1214	AT3G56940	AT3G56940.1|PACid:19662782	62.95	332	4e-155	446
slr1777	AT1G08520	AT1G08520.1|PACid:19654356	59.75	318	9e-126	394
sll1874	AT3G56940	AT3G56940.1|PACid:19662782	50.45	335	7e-126	372
slr0506	AT5G54190	AT5G54190.1|PACid:19668015	54.86	319	8e-119	352
sll1317	ATCG00540	ATCG00540.1|PACid:19638019	56.4	289	7e-118	347
slr0525	AT4G25080	AT4G25080.4|PACid:19648915	59.91	222	7e-96	284
sll0247	ATCG00280	ATCG00280.1|PACid:19637949	49.29	280	8e-85	268
slr0343	ATCG00730	ATCG00730.1|PACid:19638026	75.62	160	8e-88	257
sll0427	AT5G66570	AT5G66570.1|PACid:19671196	43.75	272	2e-63	205
slr0737	AT1G03130	AT1G03130.1|PACid:19654844	64.66	133	2e-56	178
sll0819	AT1G31330	AT1G31330.1|PACid:19656145	41.88	160	2e-36	128
ssr3451	ATCG00580	ATCG00580.1|PACid:19637986	69.14	81	1e-38	126
slr1655	AT4G12800	AT4G12800.1|PACid:19644058	44	150	3e-32	117
sll1398	AT4G28660	AT4G28660.1|PACid:19644044	45.45	110	4e-31	111
sll1418	AT3G55330	AT3G55330.1|PACid:19662700	33.99	153	5e-20	85.1
sml0005	ATCG00070	ATCG00070.1|PACid:19637972	68.18	44	6e-16	65.9
smr0006	ATCG00570	ATCG00570.1|PACid:19637979	82.35	34	3e-14	61.2
ssr2831	AT2G20260	AT2G20260.1|PACid:19640564	46.27	67	9e-13	60.1
smr0007	ATCG00560	ATCG00560.1|PACid:19638029	77.14	35	1e-12	56.6
sml0001	ATCG00080	ATCG00080.1|PACid:19637976	72.22	36	5e-12	55.1
smr0008	ATCG00550	ATCG00550.1|PACid:19638002	67.57	37	1e-11	54.3
ssr0330	AT5G23440	AT5G23440.1|PACid:19671343	36.71	79	6e-10	52.8
smr0009	ATCG00700	ATCG00700.1|PACid:19637973	48.84	43	3e-10	50.8
slr0904	AT1G08520	AT1G08520.1|PACid:19654356	26.11	157	8e-06	48.5
sml0003	ATCG00220	ATCG00220.1|PACid:19638015	55.88	34	1e-07	43.1
